# Supplementary material for: Manipulating charge-transfer kinetics and a flow-domain LiF-rich interphase to enable high-performance microsized silicon–silver–carbon composite anodes for solid-state batteries
Source: Royal Society of Chemistry journal article supplement (doi:10.1039/d3ee01696j), 2023-01-01
Supplement: d3ee01696j3.pdf [file d3ee01696j3.pdf]

## Supporting information

Manipulating charge-transfer kinetics and flow-domain LiF-rich interphase to enable high-performance micro-sized silicon-silver-carbon composite anode for solid-state batteries

Xiang Han<sup>1</sup>, Lanhui Gu<sup>1</sup>, Zhefei Sun<sup>2</sup>, Minfeng Chen<sup>1</sup>, Yinggan Zhang<sup>2</sup>, Linshan Luo<sup>3</sup>, Min Xu<sup>1</sup>, Songyan Chen<sup>3</sup>, Haodong Liu<sup>5</sup>, Jiayu Wan<sup>6</sup>, Yan-Bing He<sup>4</sup>, Jizhang Chen<sup>1,\*</sup>, Qiaobao Zhang<sup>2,7,\*</sup>

<sup>1</sup>*College of Materials Science and Engineering, Co-Innovation Center of Efficient Processing and Utilization of Forest Resources, Nanjing Forestry University, Nanjing 210037, Jiangsu, China*

<sup>2</sup>*State Key Laboratory of Physical Chemistry of Solid Surfaces, College of Materials, Xiamen University, Xiamen 361005, China*

<sup>3</sup>*Department of Physics, Xiamen University, Xiamen 361005, Fujian, China*

<sup>4</sup>*Shenzhen All-Solid-State Lithium Battery Electrolyte Engineering Research Center and Shenzhen Geim Graphene Center, Institute of Materials Research (IMR), Tsinghua Shenzhen International Graduate School, Tsinghua University, Shenzhen, China*

<sup>5</sup>*Chemical Engineering, UC San Diego, La Jolla, CA 92093, USA*

<sup>6</sup>*Department of Mechanical and Energy Engineering, Southern University of Science and Technology, Shenzhen, China*

<sup>7</sup>*Shenzhen Research Institute of Xiamen University, Shenzhen 518000, China*

\*Corresponding authors: chenjizhang@njfu.edu.cn (J. Chen);  
zhangqiaobao@xmu.edu.cn (Q. Zhang)

## Methods

### Materials synthesis

The micron-sized silicon (MSi) powders with an average diameter of  $\sim 1.5 \mu\text{m}$  was purchased from Xuzhou Lingyun Silicon Industry Co., Ltd. The MSi powders were directly put into an etching solution containing 0.02 M  $\text{AgNO}_3$  and 5 M hydrofluoric acid (HF) at  $50 \text{ }^\circ\text{C}$  and stirred for 30 min. To remove the residual solvent, the etching products were thoroughly washed by distilled water and EtOH for 5 times, respectively. After then, the as-obtained PS-Ag powders were dried in a vacuum oven at  $80 \text{ }^\circ\text{C}$  for 6 h prior to use.

NASICON-type  $\text{Li}_{1.3}\text{Al}_{0.3}\text{Ti}_{1.7}(\text{PO}_4)_3$  (LATP) was synthesized by a traditional solid-state reactive method.  $\text{LiOH}\cdot\text{H}_2\text{O}$  (99.95%, Sigma Aldrich) (10% excessive),  $\text{Al}_2\text{O}_3$  (99.99%, Sigma Aldrich),  $\text{TiO}_2$  (99.98%, Sigma Aldrich), and  $\text{NH}_4\text{H}_2\text{PO}_4$  (99.5%, Sigma Aldrich) were ground for 0.5 h in a mortar. The  $\text{LiOH}\cdot\text{H}_2\text{O}$  powders were heated at  $250 \text{ }^\circ\text{C}$  for 3 h to remove crystalline  $\text{H}_2\text{O}$ . Subsequently, the mixed powders were cold pressed into pellets with a diameter of 13 mm at 400 MPa. The pellets were then preheated at  $400 \text{ }^\circ\text{C}$  in the air for 5 h, hand-ground into fine powders, cold-pressed into pellets, and sintered at  $900 \text{ }^\circ\text{C}$  for 5 h. The as-synthesized LATP pellet was ball milled ( $600 \text{ r min}^{-1}$  for 5 h) into nanoparticles.

For the preparation of poly (vinylidene fluoride)-co-hexafluoropropylene (PVDF-HFP) /LATP composite SSE, the 0.6 g PVDF-HFP powders, 0.6 g lithium bis (trifluoromethane sulfonimide) (LiTFSI) and 0.2 g LATP nanoparticles were dissolved in DMF and stirred at  $60 \text{ }^\circ\text{C}$  for 24 h. After then, the slurry was cast on a clean glass plate, PVDF-HFP/LATP solid-state composite SSE film was fabricated after dried in a vacuum oven at  $60 \text{ }^\circ\text{C}$  for 24 h. The thickness of the prepared film PVDF-HFP/LATP SSE is  $\sim 50 \mu\text{m}$ .

### Physicochemical characterizations

The crystal structures of the as-synthesized LATP, MSi, PS-Ag and SSE were detected by X-ray diffraction (XRD) ( $\text{Cu K}\alpha$ ,  $\lambda \sim 0.15406 \text{ nm}$ ). A field-emission scanning electron microscope (FESEM, JSM-7600F) was applied to observe the

surface and cross-sectional morphology of the PS-Ag particles and PS-Ag-C electrode. The microstructures and chemical compositions of PS-Ag-C before and after cycling were analyzed by a transmission electron microscope (TEM) equipped with energy-dispersive X-ray spectroscopy (EDS) (FEI Titan F20). The nitrogen adsorption and desorption isotherm were tested at 77 K in a range of relative pressure of 0.0001–0.99 P/P<sub>0</sub> using a TriStar II surface area and porosity system (Micromeritics).

The cryo-TEM image and corresponding electron energy loss spectroscopy (EELS) spectra of SEI information was conducted by HRTEM (Aztec, Oxford Instruments). The surface chemistry was analyzed by X-ray photoelectron spectroscopy (XPS) (Thermo Scientific K<sub>α</sub> spectrometer). ToF-SIMS measurements were carried out on a PHI nanoTOF II with a Bi<sup>+</sup> source. Sputtering with an Ar<sup>+</sup> ion beam (3 keV, 100 nA) was performed for the depth profile analysis in a 400×400 μm<sup>2</sup> area. Atomic force microscopy (AFM) was performed on Bruker Dimension Icon (Germany) in an area of 5×5 μm<sup>2</sup>. Inductive coupled plasma atomic emission spectrometer (ICP-AES) was carried out on a PerkinElmer 8300. Thermal gravimetric analysis (TGA) was performed on Netzsch STA 449 F3. The volume expansion of PS-Ag-C full cell was tested on Model Coin Cell System (MCS1000, IEST) with a height accuracy of 0.1 μm.

### ***In situ* TEM observation**

The live lithiation/delithiation process of PS-Ag-C was conducted in a TEM with Nanofactory TEM-STM holder. The PS-Ag-C was loaded on the Mo tip and then contact with Li source that is mounted on a W tip. In this configuration, the naturally formed Li<sub>2</sub>O on the surface of Li metal served as solid electrolyte facilitating the diffusion of Li<sup>+</sup>. Lithiation process of PS-Ag-C was initiated by applying a positive voltage (+3V) on Li/Li<sub>2</sub>O end. Once the lithiation process finished, a reverse voltage (-3V) was applied to the Li/Li<sub>2</sub>O to start the delithiation process. In addition, in order to minimize the side effect of electron beam on experiment, the electron dosage of all the tests was controlled below 1 A cm<sup>-2</sup>.

### ***In situ* XRD measurement**

*In situ* XRD test of PS-Ag-C anode was conducted on a Bruker D8 Advance machine with Cu K $\alpha$  as the X-Ray source) with lithium foil as the counter electrode and PS-Ag-C with a loading of 8 mg cm<sup>-2</sup> serving as work electrode in a specially designed cell during the first charging and discharging process. After the cell was rested for 6 hours, it was then discharged and charged between the voltage window 0.005 and 1.5 V at 0.05 A g<sup>-1</sup> on a LAND multichannel battery tester (CT2001A) with the simultaneous collection of the phase changes of PS-Ag-C anode.

### **Electrochemical performance evaluation**

For the preparation of PS-Ag-C electrode, the PS-Ag powders and polyacrylonitrile (PAN) solution (10 wt.% dissolved in N, N-Dimethylformamide (DMF)) were mixed in a weight ratio of 7:3 and ball-milled 2 h to form a slurry. The mixed slurry was spread onto copper foil and dried for 12 h in a vacuum drying oven at 80 °C to evaporate the residual DMF. The as obtained PS-Ag-PAN on copper foil was cut into small discs with a diameter of 12 mm and then calcined at 700 °C for 2 h under Ar/H<sub>2</sub> (5%) atmosphere to obtain the PS-Ag-C electrode. The mass loading determined in our manuscript is the total mass of PS-Ag-C electrode (including Cu disc current collector) minus the mass of Cu foil, which was precisely weighed by a microbalance (METTLER TOLEDO XS3DU) with an accuracy of 1  $\mu$ g. The active material mass loading including PS, Ag and C is 0.5 – 2.3 mg cm<sup>-2</sup>.

All the electrochemical performances were tested in CR 2025-type coin cells, which were assembled in a glovebox filled with high purity Ar (H<sub>2</sub>O < 1 ppm, O<sub>2</sub> < 1 ppm). The electrolyte used in liquid cell was 1 M LiPF<sub>6</sub> in ethylene carbonate (EC)/dimethyl carbonate (DMC)/diethyl carbonate (DEC) (1:1:1 by volume) with the addition of 10 vol. % fluoroethylene carbonate (FEC). The coin cells were measured between 0.005 and 1.5 V on a LAND CT2001A battery test instrument. Cyclic voltammetry (CV) with a scan rate of 0.2 mV s<sup>-1</sup> was performed on a Bio-Logic VSP-300 electrochemical workstation. Electrochemical impedance spectroscopy (EIS) tests were carried out between 7 MHz and 0.1 Hz with an alternating current (AC) amplitude

of 10 mV to record the impedance variation of PS-Ag-C anode during cycling.

Ionic conductivity ( $\sigma$ ) of LATP/PVDF-HFP SSE was calculated based on the following formula:

$$\sigma = \frac{L}{RS} \quad (1),$$

where  $L$  is the thickness of solid polymer electrolyte;  $R$  is the high-frequency intercept obtained from the electrochemical impedance spectroscopy (EIS);  $S$  is the surface area of the electrode. The calculation formula of the lithium-ion migration number ( $t^+$ ) can be expressed as follows [1]:

$$t^+ = \frac{I_{ss}(\Delta V - I_0 R_0)}{I_0(\Delta V - I_{ss} R_{ss})} \quad (2),$$

where  $\Delta V$  is the applied polarization voltage;  $I_0$  and  $I_s$  are the initial current and steady-state current, respectively;  $R_0$  and  $R_{ss}$  are the initial resistance and steady-state resistance, respectively. Usually, a metal lithium symmetrical electrode is sandwiched with composite solid electrolytes to form a 2025 coin-type half-cell, which is tested by the AC impedance and potentiostatic chronoamperometry. For the AC impedance test, the frequency range is set as 0.01 Hz – 7 MHz, and the amplitude of the voltage is set as 10 mV. The  $I-t$  curve was obtained by the Bio-Logic VSP-300 electrochemical workstation and potentiostatic chronoamperometry, where  $\Delta V$  was 10 mV; time  $t$  was 7200 s; the test temperature was 50 °C.

To assemble the solid-state half-cell, the PVDF-HFP/LATP SSE serves as separator and electrolyte between PS-Ag-C electrode and lithium metal. Full cells were fabricated by pairing PS-Ag-C anode material and Li (Ni<sub>0.8</sub>Co<sub>0.1</sub>Mn<sub>0.1</sub>) O<sub>2</sub> (NCM, purchased from Canrd) cathode. The cathode was composed of 80 wt.% NMC811, 10 wt.% carbon black, and 10 wt.% poly (vinylidene fluoride) (PVDF). The capacity ratio of PS-Ag-C to NCM was ~ 1.1:1. The mass loading of PS-Ag-C in full cell is 0.5 mg cm<sup>-2</sup>. The specific capacity of the full cells was measured at 1 A g<sup>-1</sup> (based on PS-Ag-C) between 2.5 and 4.4 V. The electrochemical cycling performances of all solid-state cells were performed at 50 °C.

## Computational methods

All the density functional theory calculations were performed using Vienna ab initio simulation package (VASP) [2,3] with Perdew-Burke-Ernzerhof (PBE) [4] functional of the generalized-gradient approximation (GGA) to the exchange-correlation potential. Projector augmented-wave method (PAW) was used, and the plane wave basis set was cut off at the energy of 500 eV. The  $k$ -points of  $9 \times 9 \times 1$  automatically generated by the Monkhorst-Pack scheme were adopted in the Brillouin zone and a vacuum layer of 20 Å was set in present calculations. The Li diffusion barrier energies were calculated by climbing-image nudged elastic band method (CI-NEB) [5].

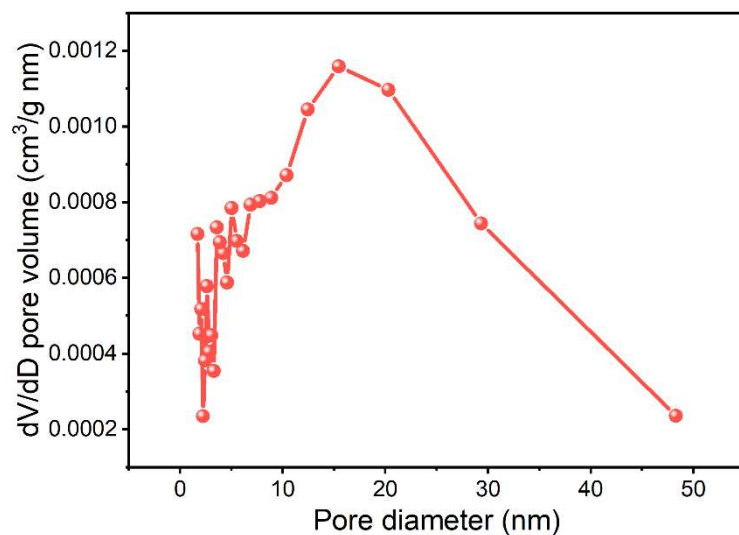

Figure. S1 BET pore size distribution for PS-Ag.

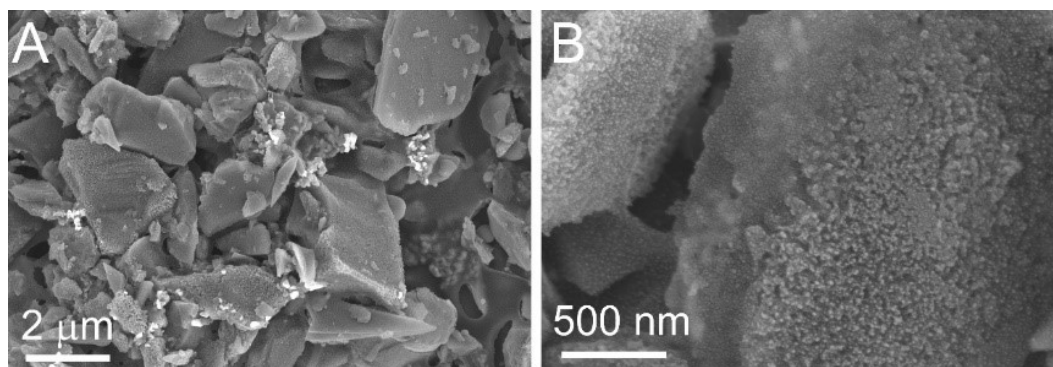

Figure.S2 (A) Surface SEM image of PS-Ag-C electrode. (B) A high magnification view in (A).

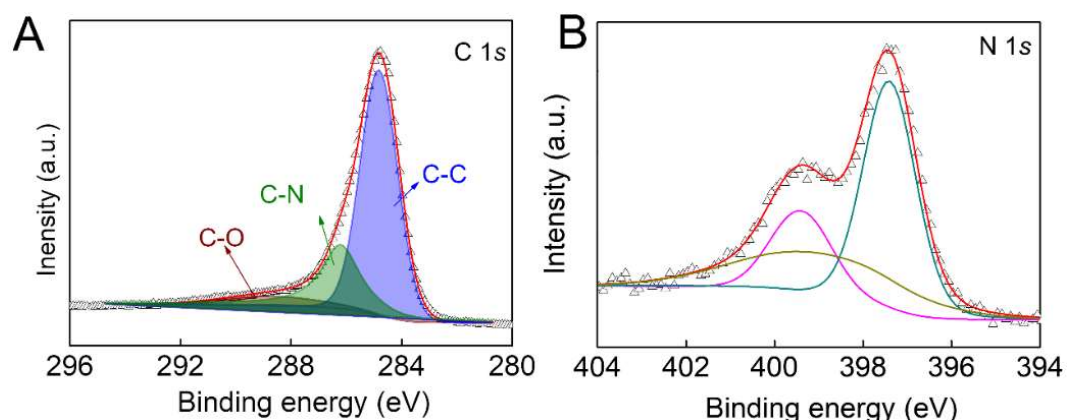

Figure.S3 High resolution XPS spectra of PS-Ag-C electrode: (A) C 1s, (B) N 1s.

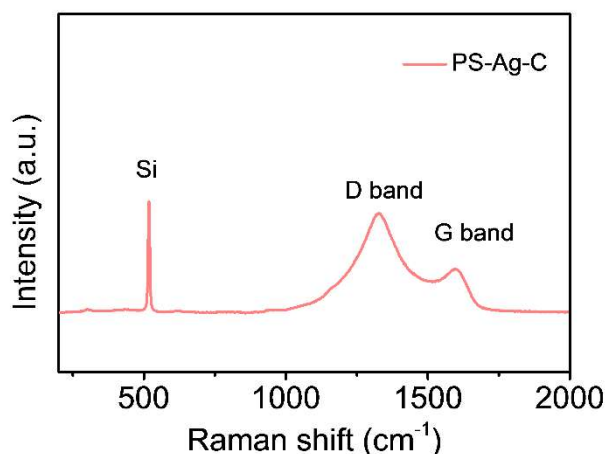

Figure. S4 Raman spectrum of PS-Ag-C electrode.

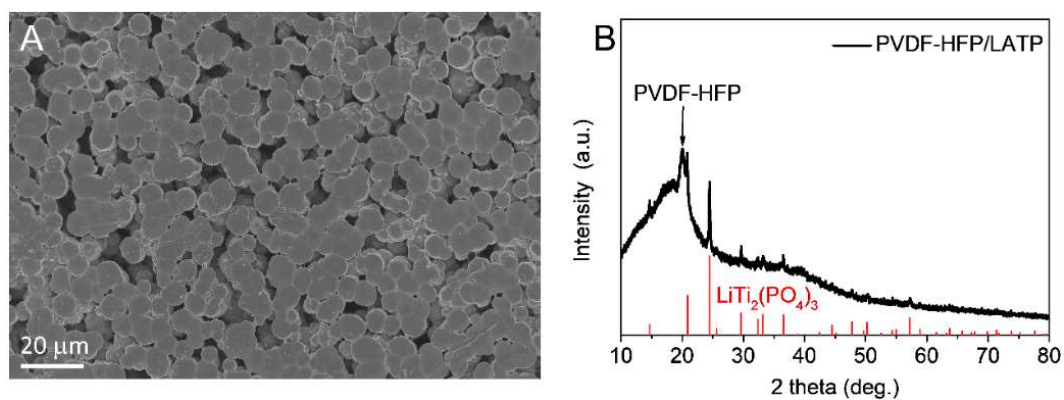

Figure. S5 (A) Surface SEM image of PVDF-HFP/LATP SSE. (B) XRD patterns of PVDF-HFP/LATP SSE.

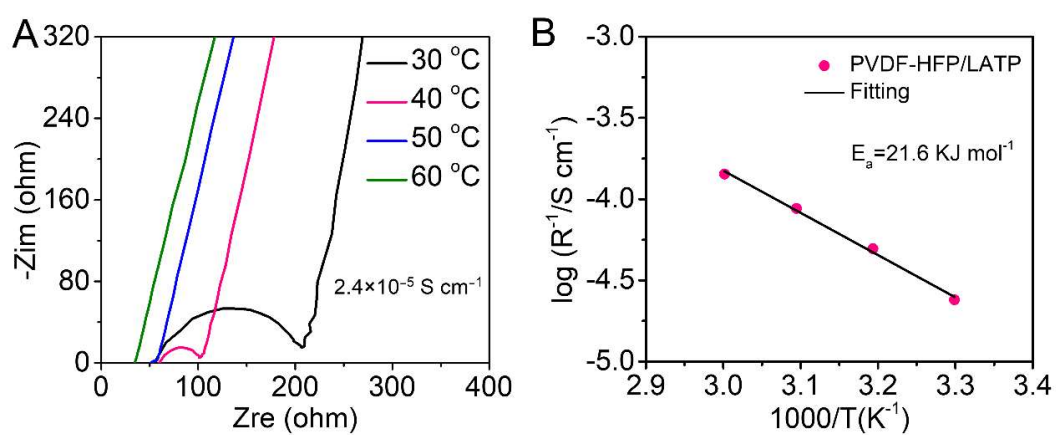

Figure. S6 (A) EIS spectra of PVDF-HFP/LATP SSE in a temperature window of 30-60 °C. (B) Arrhenius plot of conductivity for PVDF-HFP/LATP SSE.



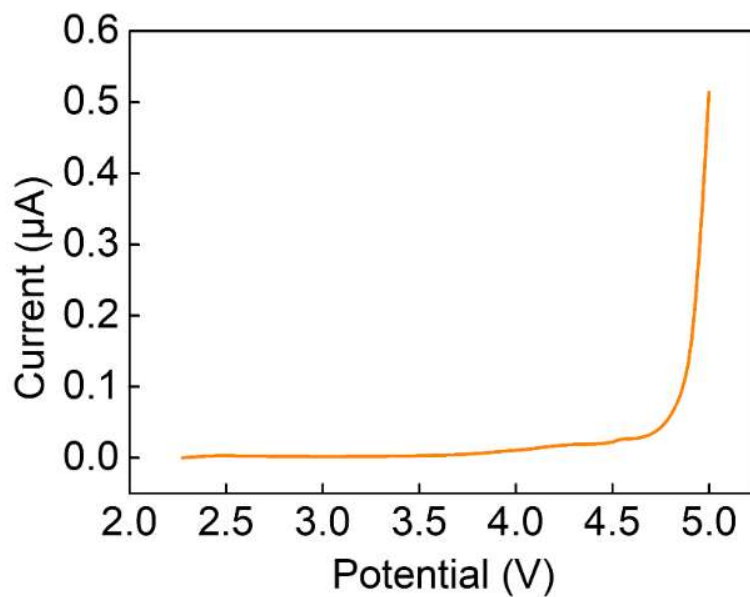

Figure. S7 Linear sweep voltammetry of PVDF-HFP/LATP SSE.

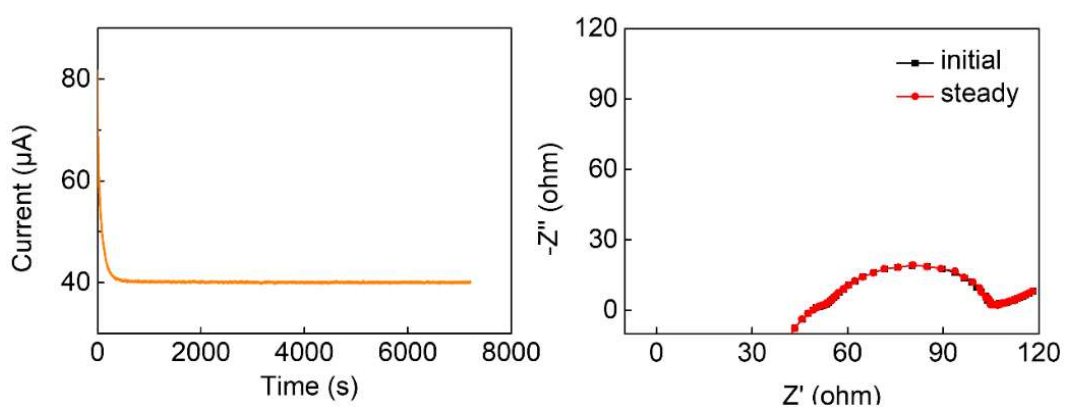

Figure. S8 (A) Current-time curve obtained from chronoamperometry at a DC polarization of 0.01 V. (B) EIS response of the cell before and after polarization.

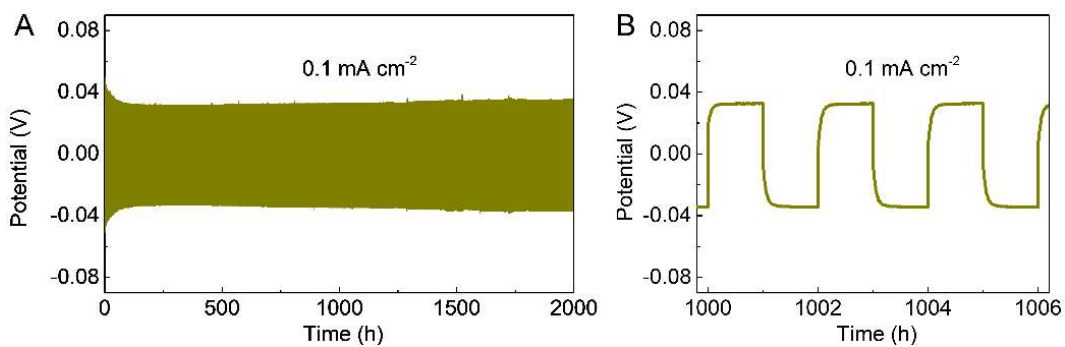

Figure. S9 (A) Voltage profiles of Li-Li symmetric cell used PVDF-HFP/LATP SSE. (B) Enlarged voltage profile in (A)

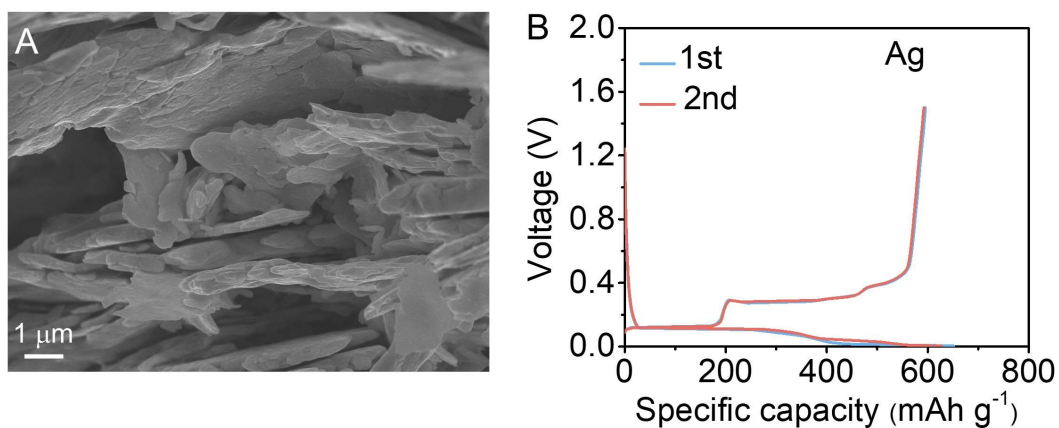

Figure S10. SEM images of Ag flakes used for electrochemical performance test. (B) The charge-discharge profiles of Ag electrode at 0.2 A/g between 0.005 and 1.5 V.

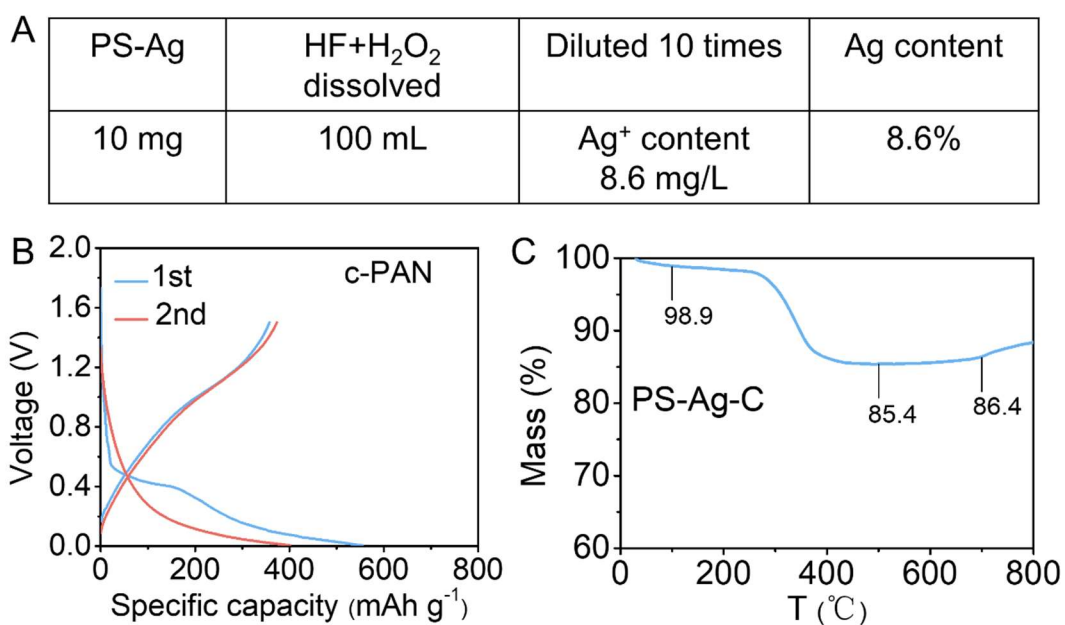

Figure S11. (A) The result of Ag content in PS-Ag measured by inductively coupled plasma atomic emission spectroscopy (ICP-AES). (B) The charge-discharge profile of carbonized PAN. (C) TG curve of PS-Ag-C powders measured by thermal gravimetric analysis (TGA).

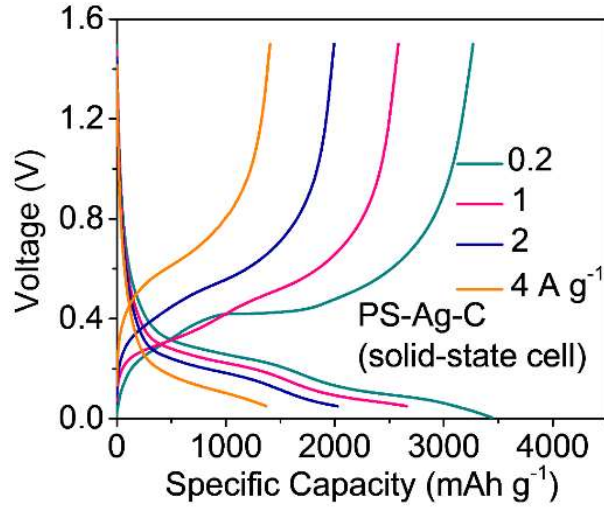

Figure. S12 Charge-discharge voltage profiles of PS-Ag-C electrode at various current density.

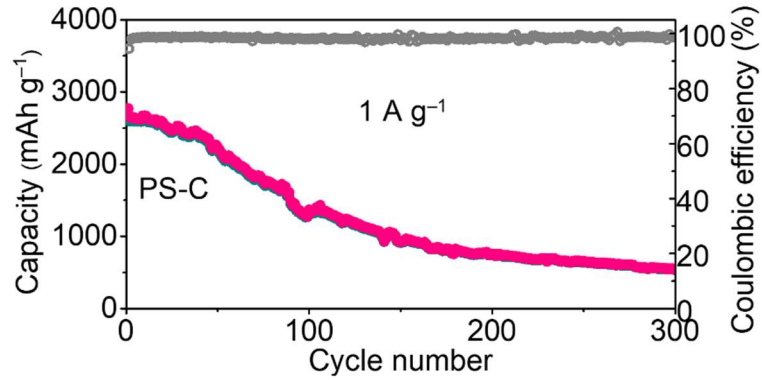

Figure S13. The cycling performance of PS-C electrode in a solid-state cell at 1 A g<sup>-1</sup>.

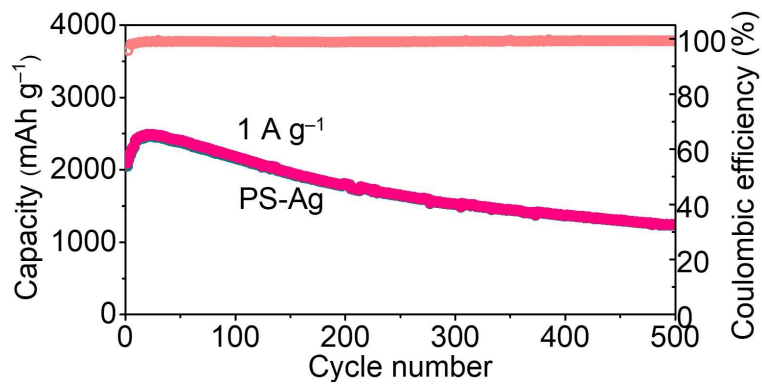

Figure S14. The cycling performance of PS-Ag electrode a solid-state cell at 1 A g<sup>-1</sup>.

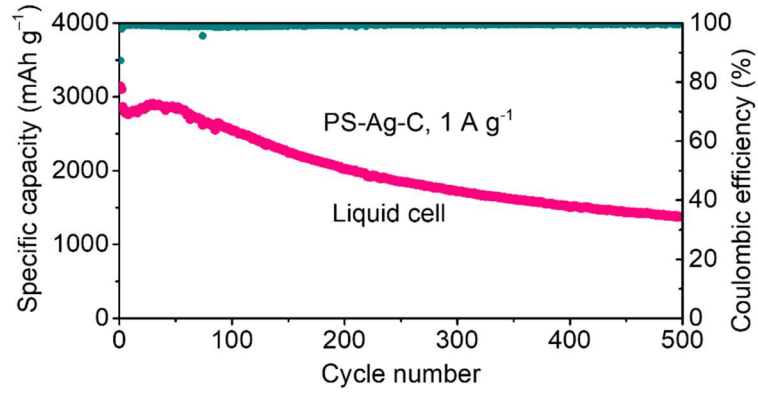

Figure S15. Cycling performance of PS-Ag-C electrode in a liquid electrolyte cell at  $1 \text{ A g}^{-1}$ .

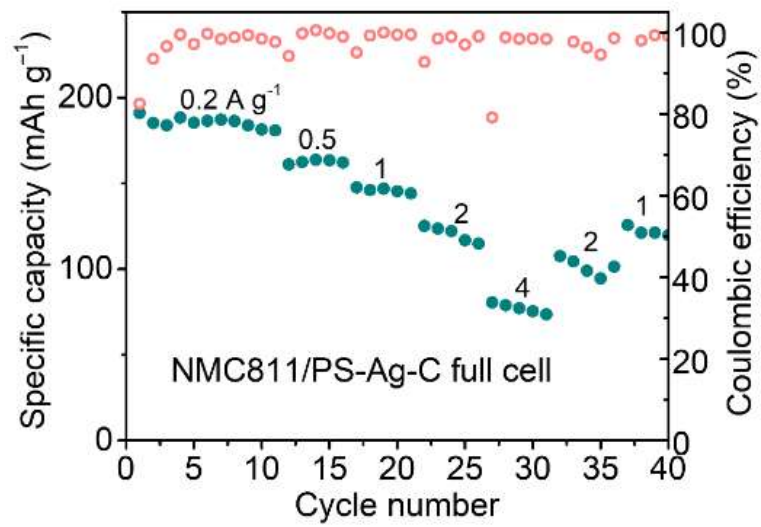

Figure S16. Rate performance of solid-state NMC811/PS-Ag-C full cell.

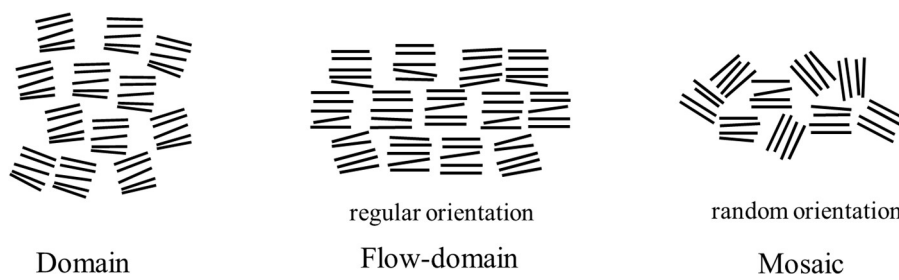

Figure S17. The schematic illustration of domain, flow domain and mosaic structure.

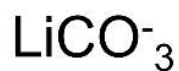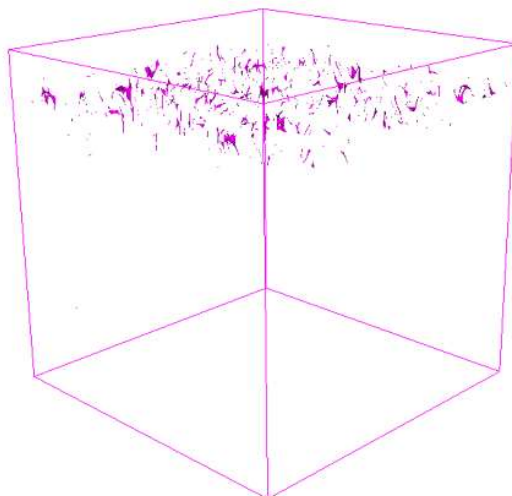

Figure S18. 3D map showing the distribution of  $\text{LiCO}_3^-$  for PS-Ag-C anode in a solid-state cell.

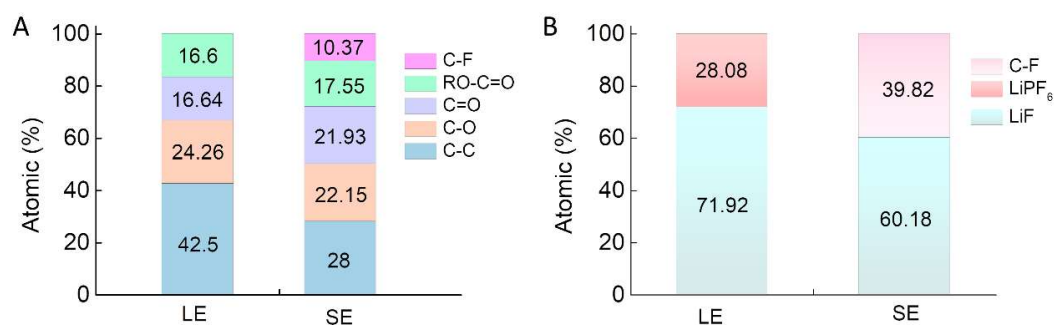

Figure. S19 The detailed content ratio of different components in the SEI layer for liquid and solid cells.

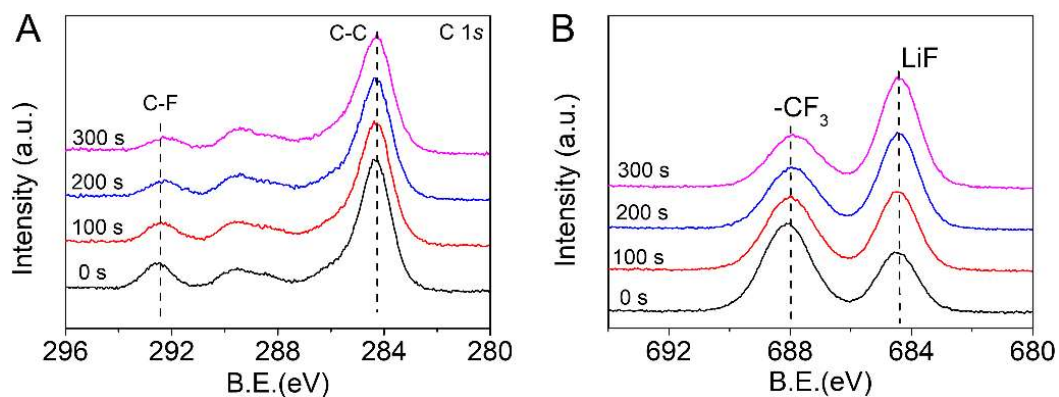

Figure S20. (A) XPS depth profiles of C 1s spectrum. (B) XPS depth profiles of F 1s spectrum.

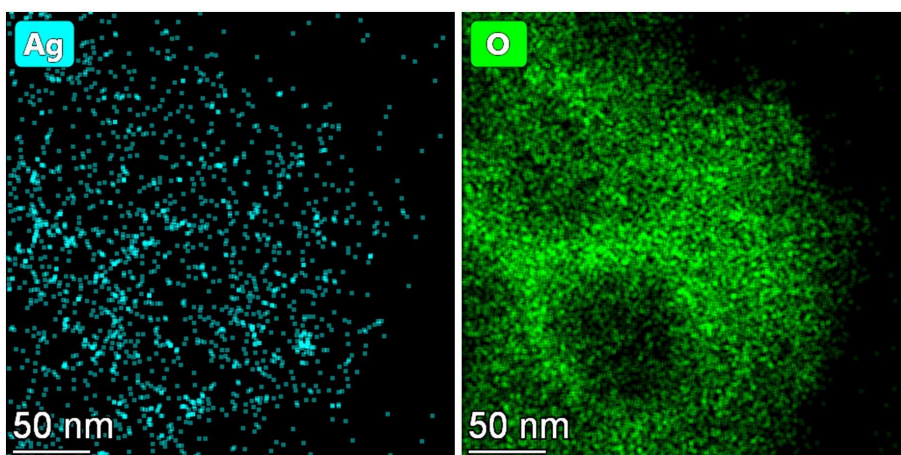

Figure S21. EDS elemental mapping of PS-Ag-C electrode after long-term cycle in a solid-state cell.

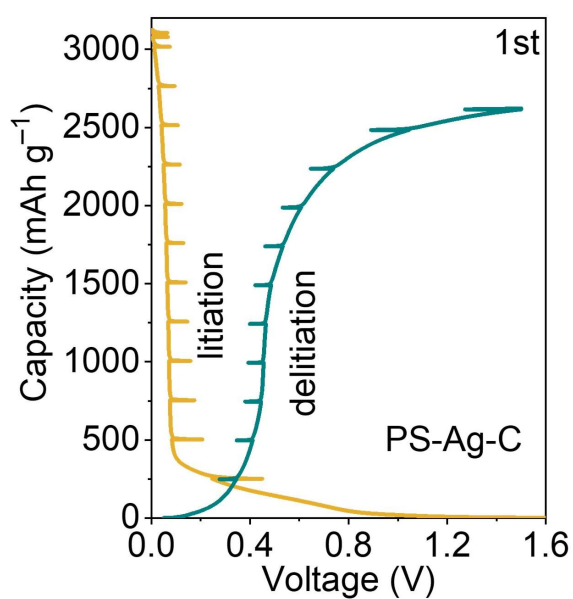

Figure S22. The charge and discharge curve of PS-Ag-C electrode during *in situ* EIS test.

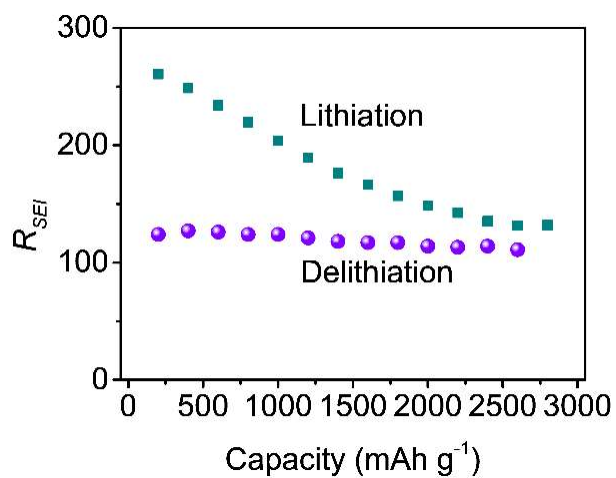

Figure S23. The fitting results of SEI resistance for a PS-Ag-C electrode during the initial cycle.

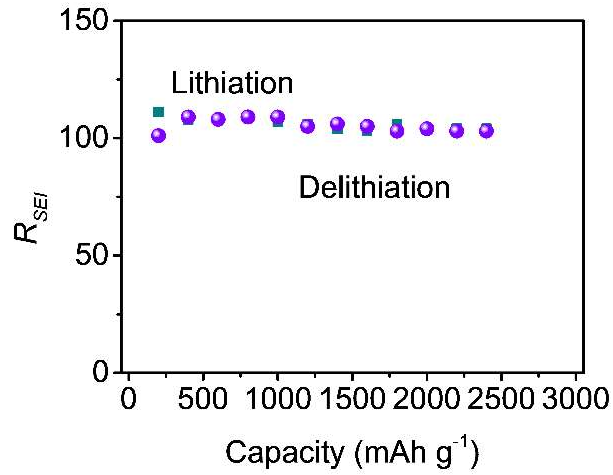

Figure 24. The fitting results of SEI resistance for a PS-Ag-C electrode during the second cycle.

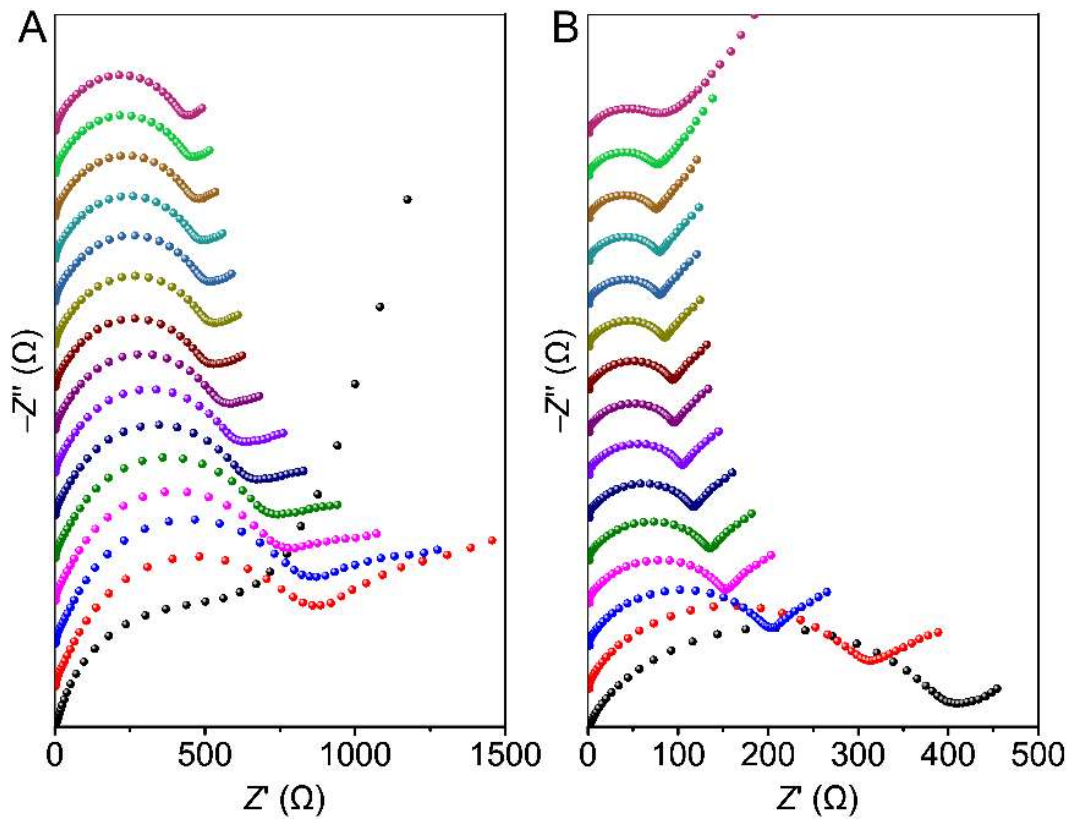

Figure S25. (A) The EIS spectra variation of PS-Ag-C anode in a liquid cell during the initial lithiation process. (B) The EIS spectra variation of PS-Ag-C anode in a liquid cell during the initial delithiation process.

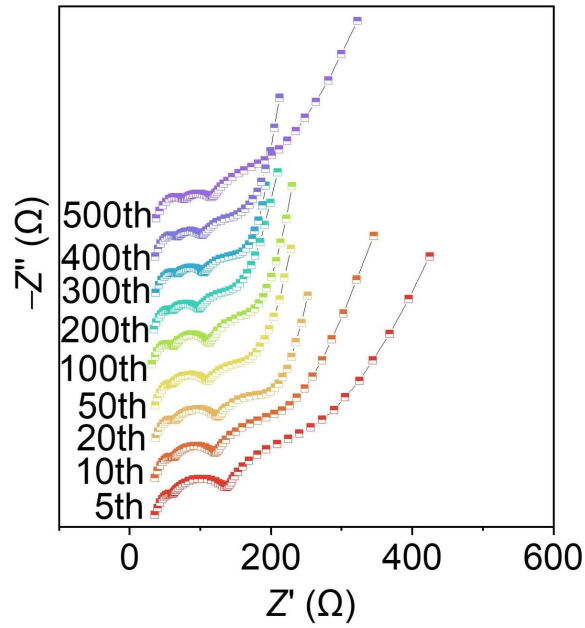

Figure S26. The EIS impedance spectra of PS-Ag-C collected during various cycles.

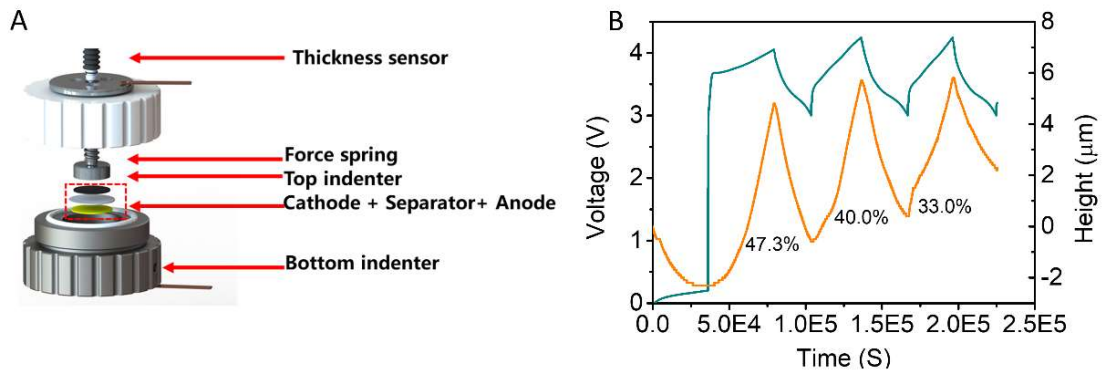

Figure S27. (A) The schematic illustration of the model coin cell system. (B) Volume expansion of the PS-AG-C full cell during the first three cycles.

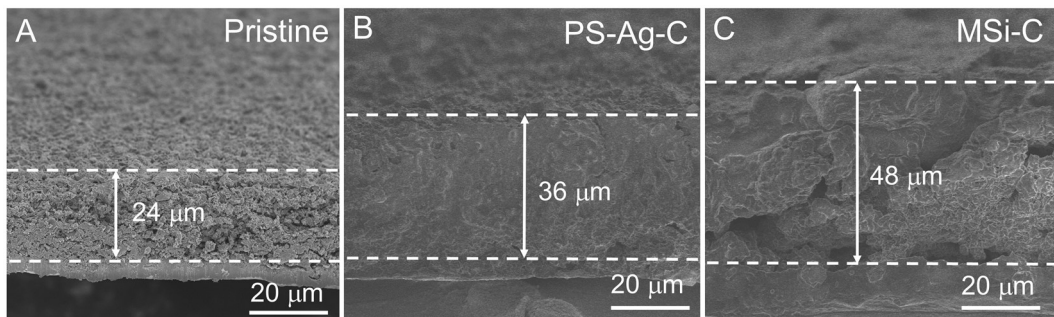

Figure S28. (A) Cross sectional SEM image of pristine PS-Ag-C electrode. (B) Cross sectional SEM image of PS-Ag-C electrode after first lithiation. (C) Cross sectional SEM image of MSi-C electrode after first lithiation.



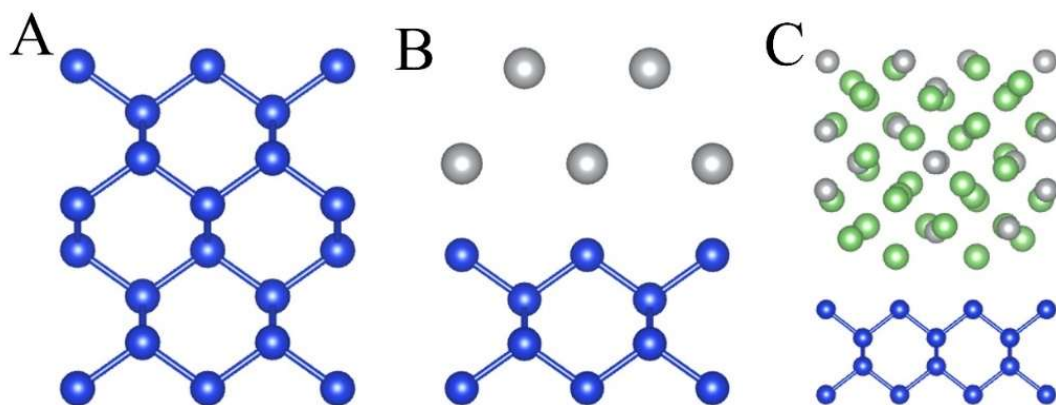

Figure S29. Side views of diffusion pathways of Li atom for (a) Si and (b) Si/Ag structures.

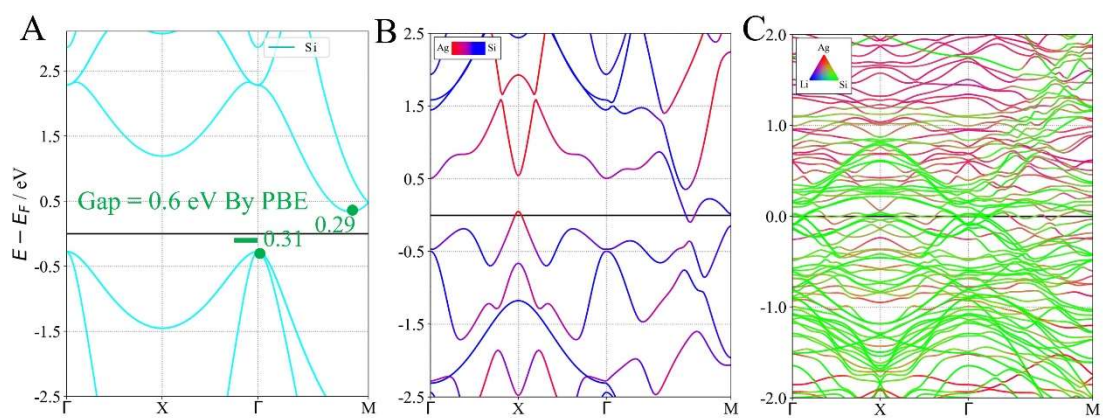

Figure S30. The calculated band structures of (A) Si, (B) Si/Ag and (C)  $\text{Li}_9\text{Ag}_4/\text{Si}$ .

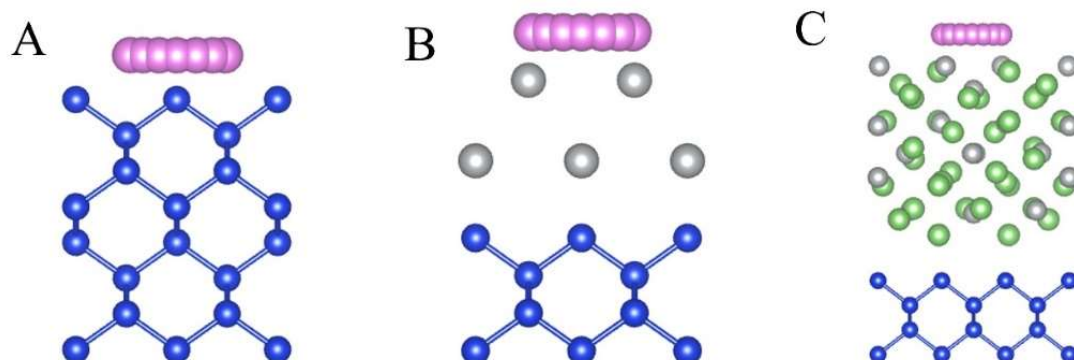

Figure S31. Side views of diffusion pathways of Li atom for (A) Si, (B) Si/Ag and (C)  $\text{Li}_9\text{Ag}_4/\text{Si}$ .

Table S1. The performance comparisons of PS-Ag-C anode with previously reported results of Si anodes in solid-state batteries

|                 | Mass loading<br>(mg/cm <sup>2</sup> ) | Areal<br>capacity<br>(mAh/cm <sup>2</sup> ) | Cycle number | ICE<br>(%) | Specific<br>capacity<br>(mAh/g) |
|-----------------|---------------------------------------|---------------------------------------------|--------------|------------|---------------------------------|
| <b>Our work</b> | <b>2</b>                              | <b>4.4</b>                                  | <b>500</b>   | <b>89</b>  | <b>3030</b>                     |
| Ref. 6          | 0.23                                  | 0.6377                                      | 200          | 85.6       | 2773                            |
| Ref. 7          | 0.7                                   | 1.75                                        | 300          | 82.7       | 2500                            |
| Ref. 8          | 0.23                                  | 0.598                                       | 140          | 95         | 2600                            |
| Ref. 9          | 1                                     | 3.5                                         | 100          | 84         | 2912                            |
| Ref. 10         | 0.05                                  | 1.35                                        | 100          | 54         | 2702                            |
| Ref. 11         | 0.74                                  | 2                                           | 375          | 90         | 3059                            |
| Ref. 12         | 0.1                                   | 2.52                                        | 200          | 68         | 2520                            |

### Captions of Supplementary Movies

Movie S1: *In situ* TEM observation of lithiation/delithiation of a PS-Ag electrode for 3 cycles at high magnification (the display was sped up by 20 times the real time of lithiation).

Movie S2: *In situ* TEM observation of lithiation/delithiation of a PS-Ag electrode for 2 cycles at low magnification (the display was sped up by 200 times the real time of lithiation).

### References

1. Chai J, *et al.* In situ generation of poly (vinylene carbonate) based solid electrolyte with interfacial stability for LiCoO<sub>2</sub> lithium batteries. *Adv. Sci.* **4**, 1600377 (2017).
2. G. Kresse, J. Furthmüller. Efficient iterative schemes for ab initio total-energy calculations using a plane-wave basis set. *Phys. Rev. B* **54**, 11169 (1996).
3. G. Kresse, D. Joubert. From ultrasoft pseudopotentials to the projector augmented-wave method. *Phys. Rev. B* **59**, 1758 (1999).
4. J.P. Perdew, K. Burke, M. Ernzerhof. Generalized gradient approximation made simple. *Phys. Rev. Lett.* **77**, 3865 (1996).
5. G. Henkelman, B.P. Uberuaga, H. Jónsson. A climbing image nudged elastic band method for finding saddle points and minimum energy paths. *J. Chem. Phys.* **113**, 9901-9904 (2000).
6. Cangaz S, *et al.* Enabling high-energy solid-state batteries with stable anode interphase by the use of columnar silicon anodes. *Adv. Energy Mater.* **10**, 202001320 (2020).
7. Cao D, Sun X, Li Y, Anderson A, Lu W, Zhu H. Long-cycling sulfide-based all-solid-state batteries enabled by electrochemo-mechanically stable electrodes. *Adv. Mater.* **34**, e2200401 (2022).
8. Cao D, Sun X, Wang Y, Zhu H. Bipolar stackings high voltage and high cell level energy density sulfide based all-solid-state batteries. *Energy Storage Mater.* **48**, 458-465 (2022).
9. Ferraresi G, El Kazzi M, Czornomaz L, Tsai C-L, Uhlenbruck S, Villevieille C. Electrochemical performance of all-solid-state li-ion batteries based on garnet electrolyte using silicon as a model electrode. *ACS Energy Lett.* **3**, 1006-1012 (2018).
10. Huo H, *et al.* Flexible interfaces between Si anodes and composite electrolytes consisting of

poly(propylene carbonates) and garnets for solid-state batteries. *J. Power Sources* **383**, 150-156 (2018).

11. Ryu J, *et al.* Room-temperature crosslinkable natural polymer binder for high-rate and stable silicon anodes. *Adv. Funct. Mater.* **30**, 201908433 (2019).
12. Yamamoto M, Terauchi Y, Sakuda A, Takahashi M. Slurry mixing for fabricating silicon-composite electrodes in all-solid-state batteries with high areal capacity and cycling stability. *J. Power Sources* **402**, 506-512 (2018).
